# Supplementary material for: Diversification of DNA binding specificities enabled SREBP transcription regulators to expand the repertoire of cellular functions that they govern in fungi
Source: PLoS Genet. 2018 Dec 31;14(12):e1007884. doi: 10.1371/journal.pgen.1007884 (PMC6329520; doi:10.1371/journal.pgen.1007884)

**S6 Fig.**

# A

**Anc4** Alignment: msaprobs Outsider: Pho4

|         |         |         |         |         |         |         |         |         |         |         |         |         |         |         |         |         |         |         |         |         |         |         |         |         |         |         |         |         |         |
|---------|---------|---------|---------|---------|---------|---------|---------|---------|---------|---------|---------|---------|---------|---------|---------|---------|---------|---------|---------|---------|---------|---------|---------|---------|---------|---------|---------|---------|---------|
| K (1.0) | K (1.0) | T (1.0) | A (1.0) | H (1.0) | N (1.0) | M (1.0) | I (1.0) | E (1.0) | K (1.0) | R (1.0) | Y (1.0) | R (1.0) | T (1.0) | N (1.0) | L (1.0) | N (1.0) | D (1.0) | K (1.0) | I (1.0) | A (1.0) | A (1.0) | L (1.0) | R (1.0) | D (1.0) | S (1.0) | V (1.0) | P (1.0) | S (1.0) | A (1.0) |
| H (1.0) | K (1.0) | L (1.0) | N (1.0) | K (1.0) | A (1.0) | T (1.0) | V (1.0) | L (1.0) | S (1.0) | K (1.0) | A (1.0) | T (1.0) | E (1.0) | Y (1.0) | I (1.0) | H (1.0) | H (1.0) | L (1.0) | E (1.0) | K (1.0) | R (1.0) | V (1.0) | K (1.0) | R (1.0) |         |         |         |         |         |

**Anc5** Alignment: msaprobs Outsider: Pho4

|         |         |         |         |         |         |         |         |         |         |         |         |         |         |         |         |         |         |         |         |         |         |         |         |         |         |         |         |         |         |
|---------|---------|---------|---------|---------|---------|---------|---------|---------|---------|---------|---------|---------|---------|---------|---------|---------|---------|---------|---------|---------|---------|---------|---------|---------|---------|---------|---------|---------|---------|
| K       | K       | T       | A       | H       | N (1.0) | M (1.0) | I (1.0) | E       | K (1.0) | R (1.0) | Y (1.0) | R       | T (1.0) | N (1.0) | L       | N (1.0) | D (1.0) | K (1.0) | I (1.0) | A       | A       | L (1.0) | R (1.0) | D (1.0) | A (1.0) | V (1.0) | P (1.0) | S       | A (1.0) |
| (0.997) | (0.996) | (0.962) | (0.998) | (1.0)   |         |         |         | (1.0)   |         |         |         | (1.0)   |         |         | (0.999) |         |         |         |         | (0.895) | (0.984) |         |         |         |         |         |         | (0.986) |         |
| R       | K (1.0) | L (1.0) | N (1.0) | K (1.0) | A       | T (1.0) | I (1.0) | L (1.0) | S       | K (1.0) | A (1.0) | T (1.0) | E (1.0) | Y (1.0) | I (1.0) | R       | H (1.0) | L (1.0) | E (1.0) | R       | K       | N (1.0) | K       | K       |         |         |         |         |         |
| (0.952) |         |         |         |         | (0.996) |         |         |         | (0.999) |         |         |         |         |         |         | (0.664) |         |         |         | (0.458) | (0.945) |         | (0.892) | (0.401) |         |         |         |         |         |

**Anc5** Alignment: muscle Outsider: Pho4

|         |         |         |          |         |         |           |         |         |         |         |         |         |         |         |         |         |           |         |         |         |         |         |          |           |         |         |         |         |          |
|---------|---------|---------|----------|---------|---------|-----------|---------|---------|---------|---------|---------|---------|---------|---------|---------|---------|-----------|---------|---------|---------|---------|---------|----------|-----------|---------|---------|---------|---------|----------|
| Q       | K       | L       | A (0.99) | H       | N (1.0) | K         | I       | E       | K       | K       | Y (1.0) | R       | I       | N (1.0) | I (1.0) | N (1.0) | T         | K       | I       | A       | K       | L (1.0) | Q        | K         | L       | I       | P (1.0) | W (1.0) | S (0.88) |
| (0.999) | (0.994) | (0.607) |          | (1.0)   |         | (0.892)   | (0.999) | (1.0)   | (0.998) | (0.999) |         | (1.0)   | (0.957) |         |         |         | (0.974)   | (0.999) | (0.989) | (0.606) | (0.519) |         | (0.995)  | (0.662)   | (0.574) | (0.975) |         |         |          |
| T       | K       | L       | N        | K (1.0) | S (1.0) | I (0.615) |         | (0.999) | L (1.0) | E       | K       | A (1.0) | V       | E       | Y (1.0) | I (1.0) | L (0.563) | Y       | Y       | L (1.0) | Q       | Q       | N (0.56) | N (0.973) | E       | R       | R       | L       |          |
| (0.755) | (0.999) | (0.954) | (0.989)  |         |         |           |         |         |         | (0.532) | (0.995) |         | (0.568) | (0.729) |         |         |           | (0.939) | (0.939) |         | (0.999) |         |          | (0.973)   | (0.968) | (0.361) | (0.467) |         |          |

**Anc5** Alignment: muscle      Outsider: Pho4 (Mouse and Human SREBP1 and SREBP2 included)

|         |         |         |         |         |         |         |           |         |          |         |         |         |         |         |         |         |         |         |         |         |         |         |         |         |         |          |         |
|---------|---------|---------|---------|---------|---------|---------|-----------|---------|----------|---------|---------|---------|---------|---------|---------|---------|---------|---------|---------|---------|---------|---------|---------|---------|---------|----------|---------|
| K       | K       | T       | A       | H       | N       | A       | I         | E       | K        | R       | Y       | R       | N       | N       | D       | R       | I       | A       | A       | L       | R       | D       | A       | V       | P       | A        | A       |
| (0.96)  | (0.998) | (0.987) | (0.994) | (1.0)   | N (1.0) | (0.965) | (0.995)   | (1.0)   | (0.802)  | (1.0)   | (1.0)   | (1.0)   | (0.998) | N (1.0) | (1.0)   | (1.0)   | (0.997) | (0.884) | (1.0)   | (0.897) | (0.992) | (0.975) | (0.839) | (0.824) | (1.0)   | (0.917)  | (0.999) |
| T       | K       | L       | N       | K       | A       | T       | E         | L       | S        | K       | A       | T       | E       | Y       | I       | Q       | H       | L       | K       | K       | R       | N       | K       | K       | R       | N        | A       |
| (0.952) | K (1.0) | (0.99)  | (0.993) | K (1.0) | (0.999) | (0.994) | I (0.934) | L (1.0) | S (0.79) | K (1.0) | (0.998) | (0.996) | (0.998) | Y (1.0) | I (1.0) | (0.522) | (0.792) | L (1.0) | (0.851) | (0.523) | (0.986) | (0.699) | (0.711) | (0.684) | (0.952) | A (0.26) |         |
|         |         |         |         |         |         |         |           |         |          |         |         |         |         |         |         |         |         |         |         |         |         |         |         |         |         |          |         |
|         |         |         |         |         |         |         |           |         |          |         |         |         |         |         |         |         |         |         |         |         |         |         |         |         |         |          |         |
|         |         |         |         |         |         |         |           |         |          |         |         |         |         |         |         |         |         |         |         |         |         |         |         |         |         |          |         |
|         |         |         |         |         |         |         |           |         |          |         |         |         |         |         |         |         |         |         |         |         |         |         |         |         |         |          |         |
|         |         |         |         |         |         |         |           |         |          |         |         |         |         |         |         |         |         |         |         |         |         |         |         |         |         |          |         |
|         |         |         |         |         |         |         |           |         |          |         |         |         |         |         |         |         |         |         |         |         |         |         |         |         |         |          |         |
|         |         |         |         |         |         |         |           |         |          |         |         |         |         |         |         |         |         |         |         |         |         |         |         |         |         |          |         |
|         |         |         |         |         |         |         |           |         |          |         |         |         |         |         |         |         |         |         |         |         |         |         |         |         |         |          |         |
|         |         |         |         |         |         |         |           |         |          |         |         |         |         |         |         |         |         |         |         |         |         |         |         |         |         |          |         |
|         |         |         |         |         |         |         |           |         |          |         |         |         |         |         |         |         |         |         |         |         |         |         |         |         |         |          |         |
|         |         |         |         |         |         |         |           |         |          |         |         |         |         |         |         |         |         |         |         |         |         |         |         |         |         |          |         |
|         |         |         |         |         |         |         |           |         |          |         |         |         |         |         |         |         |         |         |         |         |         |         |         |         |         |          |         |
|         |         |         |         |         |         |         |           |         |          |         |         |         |         |         |         |         |         |         |         |         |         |         |         |         |         |          |         |
|         |         |         |         |         |         |         |           |         |          |         |         |         |         |         |         |         |         |         |         |         |         |         |         |         |         |          |         |
|         |         |         |         |         |         |         |           |         |          |         |         |         |         |         |         |         |         |         |         |         |         |         |         |         |         |          |         |
|         |         |         |         |         |         |         |           |         |          |         |         |         |         |         |         |         |         |         |         |         |         |         |         |         |         |          |         |
|         |         |         |         |         |         |         |           |         |          |         |         |         |         |         |         |         |         |         |         |         |         |         |         |         |         |          |         |
|         |         |         |         |         |         |         |           |         |          |         |         |         |         |         |         |         |         |         |         |         |         |         |         |         |         |          |         |
|         |         |         |         |         |         |         |           |         |          |         |         |         |         |         |         |         |         |         |         |         |         |         |         |         |         |          |         |
|         |         |         |         |         |         |         |           |         |          |         |         |         |         |         |         |         |         |         |         |         |         |         |         |         |         |          |         |
|         |         |         |         |         |         |         |           |         |          |         |         |         |         |         |         |         |         |         |         |         |         |         |         |         |         |          |         |
|         |         |         |         |         |         |         |           |         |          |         |         |         |         |         |         |         |         |         |         |         |         |         |         |         |         |          |         |
|         |         |         |         |         |         |         |           |         |          |         |         |         |         |         |         |         |         |         |         |         |         |         |         |         |         |          |         |
|         |         |         |         |         |         |         |           |         |          |         |         |         |         |         |         |         |         |         |         |         |         |         |         |         |         |          |         |
|         |         |         |         |         |         |         |           |         |          |         |         |         |         |         |         |         |         |         |         |         |         |         |         |         |         |          |         |
|         |         |         |         |         |         |         |           |         |          |         |         |         |         |         |         |         |         |         |         |         |         |         |         |         |         |          |         |
|         |         |         |         |         |         |         |           |         |          |         |         |         |         |         |         |         |         |         |         |         |         |         |         |         |         |          |         |
|         |         |         |         |         |         |         |           |         |          |         |         |         |         |         |         |         |         |         |         |         |         |         |         |         |         |          |         |
|         |         |         |         |         |         |         |           |         |          |         |         |         |         |         |         |         |         |         |         |         |         |         |         |         |         |          |         |
|         |         |         |         |         |         |         |           |         |          |         |         |         |         |         |         |         |         |         |         |         |         |         |         |         |         |          |         |
|         |         |         |         |         |         |         |           |         |          |         |         |         |         |         |         |         |         |         |         |         |         |         |         |         |         |          |         |
|         |         |         |         |         |         |         |           |         |          |         |         |         |         |         |         |         |         |         |         |         |         |         |         |         |         |          |         |
|         |         |         |         |         |         |         |           |         |          |         |         |         |         |         |         |         |         |         |         |         |         |         |         |         |         |          |         |
|         |         |         |         |         |         |         |           |         |          |         |         |         |         |         |         |         |         |         |         |         |         |         |         |         |         |          |         |
|         |         |         |         |         |         |         |           |         |          |         |         |         |         |         |         |         |         |         |         |         |         |         |         |         |         |          |         |
|         |         |         |         |         |         |         |           |         |          |         |         |         |         |         |         |         |         |         |         |         |         |         |         |         |         |          |         |
|         |         |         |         |         |         |         |           |         |          |         |         |         |         |         |         |         |         |         |         |         |         |         |         |         |         |          |         |
|         |         |         |         |         |         |         |           |         |          |         |         |         |         |         |         |         |         |         |         |         |         |         |         |         |         |          |         |
|         |         |         |         |         |         |         |           |         |          |         |         |         |         |         |         |         |         |         |         |         |         |         |         |         |         |          |         |
|         |         |         |         |         |         |         |           |         |          |         |         |         |         |         |         |         |         |         |         |         |         |         |         |         |         |          |         |
|         |         |         |         |         |         |         |           |         |          |         |         |         |         |         |         |         |         |         |         |         |         |         |         |         |         |          |         |
|         |         |         |         |         |         |         |           |         |          |         |         |         |         |         |         |         |         |         |         |         |         |         |         |         |         |          |         |
|         |         |         |         |         |         |         |           |         |          |         |         |         |         |         |         |         |         |         |         |         |         |         |         |         |         |          |         |
|         |         |         |         |         |         |         |           |         |          |         |         |         |         |         |         |         |         |         |         |         |         |         |         |         |         |          |         |
|         |         |         |         |         |         |         |           |         |          |         |         |         |         |         |         |         |         |         |         |         |         |         |         |         |         |          |         |
|         |         |         |         |         |         |         |           |         |          |         |         |         |         |         |         |         |         |         |         |         |         |         |         |         |         |          |         |
|         |         |         |         |         |         |         |           |         |          |         |         |         |         |         |         |         |         |         |         |         |         |         |         |         |         |          |         |
|         |         |         |         |         |         |         |           |         |          |         |         |         |         |         |         |         |         |         |         |         |         |         |         |         |         |          |         |
|         |         |         |         |         |         |         |           |         |          |         |         |         |         |         |         |         |         |         |         |         |         |         |         |         |         |          |         |
|         |         |         |         |         |         |         |           |         |          |         |         |         |         |         |         |         |         |         |         |         |         |         |         |         |         |          |         |
|         |         |         |         |         |         |         |           |         |          |         |         |         |         |         |         |         |         |         |         |         |         |         |         |         |         |          |         |
|         |         |         |         |         |         |         |           |         |          |         |         |         |         |         |         |         |         |         |         |         |         |         |         |         |         |          |         |
|         |         |         |         |         |         |         |           |         |          |         |         |         |         |         |         |         |         |         |         |         |         |         |         |         |         |          |         |
|         |         |         |         |         |         |         |           |         |          |         |         |         |         |         |         |         |         |         |         |         |         |         |         |         |         |          |         |
|         |         |         |         |         |         |         |           |         |          |         |         |         |         |         |         |         |         |         |         |         |         |         |         |         |         |          |         |
|         |         |         |         |         |         |         |           |         |          |         |         |         |         |         |         |         |         |         |         |         |         |         |         |         |         |          |         |
|         |         |         |         |         |         |         |           |         |          |         |         |         |         |         |         |         |         |         |         |         |         |         |         |         |         |          |         |
|         |         |         |         |         |         |         |           |         |          |         |         |         |         |         |         |         |         |         |         |         |         |         |         |         |         |          |         |
|         |         |         |         |         |         |         |           |         |          |         |         |         |         |         |         |         |         |         |         |         |         |         |         |         |         |          |         |
|         |         |         |         |         |         |         |           |         |          |         |         |         |         |         |         |         |         |         |         |         |         |         |         |         |         |          |         |
|         |         |         |         |         |         |         |           |         |          |         |         |         |         |         |         |         |         |         |         |         |         |         |         |         |         |          |         |
|         |         |         |         |         |         |         |           |         |          |         |         |         |         |         |         |         |         |         |         |         |         |         |         |         |         |          |         |

# B

[illegible]

**C**

palindromic E-box      TCTGGCCAACA**TCA**GGTGAACGCAGGAAAA  
mutant DNA              TCTGGCCAACA**TCTTTA**AACGCAGGAAAA

non-palindromic site      ACAAAAAAAAAA**TCA**GGCCAATTTGTAATACT  
mutant DNA                ACAAAAAAAAAA**TCT**AAATTTGTAATACT

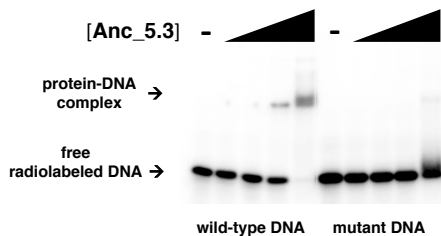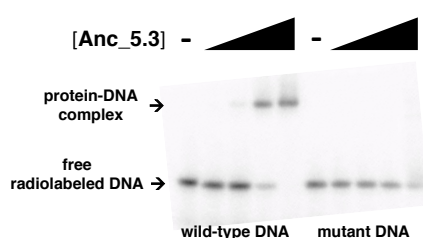

Supplement: S6 Fig — (A) Phylobot output displaying the probabilities of the given residues at each position of the reconstructed ancestors. Three reconstructions applying different alignment methods were used to infer the sequence of the “oldest” ancestor (Anc5). (B) Amino acid sequences of eight different versions of Anc5 that were synthesized and tested in in vitro gel shift experiments. Anc5.3 showed the highest affinity for DNA; hence it was selected for further characterization. Dots in the alignment represent the same amino acid residue written at the top of the column. (C) Gel shift assays testing the binding specificity of the purified Anc5 protein (0, 6.25, 25, 100 and 400 nM) towards the palindromic (left) and the non-palindromic (right) DNA sequences. Point mutations (in red) introduced in the DNA fragment abolished binding. (PDF) [file pgen.1007884.s013.pdf]
