# Supplementary material for: Diversification of DNA binding specificities enabled SREBP transcription regulators to expand the repertoire of cellular functions that they govern in fungi
Source: PubMed Central journal article supplement (PMC6329520; doi:10.1371/journal.pgen.1007884), 2018-12-31
Supplement: pgen.1007884.s004.pdf [file pgen.1007884.s004.pdf]

**S4 Table.** *C. albicans* strains used in this study

| Strain | Genotype                                |                          |                          |                                  |                                | Source     |
|--------|-----------------------------------------|--------------------------|--------------------------|----------------------------------|--------------------------------|------------|
| SN250  | <u><i>ura3Δ::λimm434::URA3-IRO1</i></u> | <u><i>arg4::hisG</i></u> | <u><i>his1::hisG</i></u> | <u><i>leu2::hisG::CdHIS1</i></u> |                                | [1]        |
|        | <i>ura3Δ::λimm434</i>                   | <i>arg4::hisG</i>        | <i>his1::hisG</i>        | <i>leu2::hisG::CmLEU2</i>        |                                |            |
| TF02   | <u><i>ura3Δ::λimm434::URA3-IRO1</i></u> | <u><i>arg4::hisG</i></u> | <u><i>his1::hisG</i></u> | <u><i>hms1Δ::CdHIS1</i></u>      |                                | [1]        |
|        | <i>ura3Δ::λimm434</i>                   | <i>arg4::hisG</i>        | <i>his1::hisG</i>        | <i>hms1Δ::CmLEU2</i>             |                                |            |
| TF138  | <u><i>ura3Δ::λimm434::URA3-IRO1</i></u> | <u><i>arg4::hisG</i></u> | <u><i>his1::hisG</i></u> | <u><i>cph2Δ::CdHIS1</i></u>      |                                | [1]        |
|        | <i>ura3Δ::λimm434</i>                   | <i>arg4::hisG</i>        | <i>his1::hisG</i>        | <i>cph2Δ::CmLEU2</i>             |                                |            |
| JCP880 | <u><i>ura3Δ::λimm434::URA3-IRO1</i></u> | <u><i>arg4::hisG</i></u> | <u><i>his1::hisG</i></u> | <u><i>leu2::hisG::CdHIS1</i></u> | <u><i>CPH2 (1-407)-myc</i></u> | This study |
|        | <i>ura3Δ::λimm434</i>                   | <i>arg4::hisG</i>        | <i>his1::hisG</i>        | <i>leu2::hisG::CmLEU2</i>        | <i>CPH2</i>                    |            |

1. Noble SM, Johnson AD. Strains and strategies for large-scale gene deletion studies of the diploid human fungal pathogen *Candida albicans*. *Eukaryot Cell*. 2005;4: 298–309.
