# Supplementary material for: Diversification of DNA binding specificities enabled SREBP transcription regulators to expand the repertoire of cellular functions that they govern in fungi
Source: PubMed Central journal article supplement (PMC6329520; doi:10.1371/journal.pgen.1007884), 2018-12-31
Supplement: pgen.1007884.s005.pdf [file pgen.1007884.s005.pdf]

**S5 Table.** Oligos used in this study

| Number                               | Description                     | Sequence (5' to 3')                                                                                 |
|--------------------------------------|---------------------------------|-----------------------------------------------------------------------------------------------------|
| Oligos used for plasmid construction |                                 |                                                                                                     |
| 1425                                 | <i>CaHms1</i> into pLIC-H3 FW   | AGCAGCCCCGGGTCAACAATTATTAATGAACCAAC                                                                 |
| 1429                                 | <i>CaHms1</i> into pLIC-H3 RV   | GTGGTGCTCGAGCTACATATCTTCATCAATAACTAAAC                                                              |
| 1426                                 | <i>CaCph2</i> into pLIC-H3 FW   | AGCAGCCCCGGGGCCAAAGTCACAAAGCCAAAATC                                                                 |
| 1430                                 | <i>CaCph2</i> into pLIC-H3 RV   | GTGGTGCTCGAGTTATAATGACTTTGGATTTCATGTTGGC                                                            |
| 1513                                 | <i>CaTye7</i> into pbRZ75 FW    | CATATGGCTAGCACTAAACCAAAGAGAAGAGCACC                                                                 |
| 1660                                 | <i>CaTye7</i> into pbRZ75 RV    | GTGGTGCTCGAGCTATATTTACCACCCAATTTAATAAC                                                              |
| 2044                                 | <i>CpHms1</i> into pbRZ75 FW 1A | CATATGGCTAGCAGTACAACAATTACAGCTTCCAGTG                                                               |
| 2006                                 | <i>CpHms1</i> into pbRZ75 RV 1B | GATGGAATGGATTTGTTCGATTCTTGATGATAAG                                                                  |
| 2007                                 | <i>CpHms1</i> into pbRZ75 FW 2A | CTTATCATCAAGAATCGACAAATCCATTCCATC                                                                   |
| 2008                                 | <i>CpHms1</i> into pbRZ75 RV 2B | GTGGTGCTCGAGTTATTCTTCTTCATCAAAATCAACACCC                                                            |
| 2030                                 | <i>AfSrbA</i> into pLIC-H3 FW   | AGCAGCCCCGGGACTGGAAGCGATGACGATGGATCTA                                                               |
| 2031                                 | <i>AfSrbA</i> into pLIC-H3 RV   | GTGGTGCTCGAGCTAGGTAACAATCTGATCAGCGGCCTTG                                                            |
| 1783                                 | Helix1 chimera into pLIC-H3 1A  | ATTAAATCAGCTCATAATGTAATTGAACAACGATATCGAAAT<br>AAAATTAATGATAAATTTAATGCTTTACAAAATTCT                  |
| 1784                                 | Helix1 chimera into pLIC-H3 1B  | AGAATTTTGTAAAGCATTAAATTTATCATTAATTTTATTTTCG<br>ATATCGTTGTTCAATTACATTATGAGCTGATTTAAT                 |
| 1357                                 | Helix1 chimera into pLIC-H3 2A  | GCACCATCATCATCACCATC                                                                                |
| 1785                                 | Helix1 chimera into pLIC-H3 2B  | CAATTACATTATGAGCTGATTTAATTTTTGATTTTGGC                                                              |
| 1786                                 | Helix1 chimera into pLIC-H3 3A  | TAAATTTAATGCTTTACAAAATCTGTGCCTGCTC                                                                  |
| 1358                                 | Helix1 chimera into pLIC-H3 3B  | CTTTCGGGCTTTGTTAGCAG                                                                                |
| 1839                                 | Helix 2 chimera into pLIC-H3 1B | TTGTTCCCTTTATTCAATTTTCTTGCTGGTGTTAACC                                                               |
| 1840                                 | Helix 2 chimera into pLIC-H3 2A | GCAAGAAAATTGAATAAAGGAACAATATTAGCTAAATCTATT<br>GAATATATTAATTTTTAGAAAATGAAAAATGAAAGA                  |
| 1841                                 | Helix 2 chimera into pLIC-H3 2B | TCTTTTCATTTTTTCATTTCTAAAAATTTAATATATTCAATAGA<br>TTTAGCTAATATTGTTCCCTTTATTCAATTTTCTTGC               |
| 1862                                 | Helix 2 chimera into pLIC-H3 3A | ATTTTTAGAAAATGAAAAATGAAAGATTGAAACAACA                                                               |
| 1843                                 | Helix1+Loop chimera 1B          | GCTTTTTTTGGGCTAATATTCTTAAAGCAGGCACA                                                                 |
| 1844                                 | Helix1+Loop chimera 2A          | TTAAGAATATTAGCCCAAAA                                                                                |
| 1845                                 | Helix1+Loop chimera 2B          | TGTTTCTAATCCTTCTAAAT                                                                                |
| 1863                                 | Helix1+Loop chimera 3A          | TATTGATTTAGAAGGATTAGAACCAGCATCTAAGTTAAAC                                                            |
| 2071                                 | Loop chimera 1B                 | GCTTTTTTTGGGCTAATATTCTTAAAGCAGGCACAG                                                                |
| 1844                                 | Loop chimera 2A                 | TTAAGAATATTAGCCCAAAA                                                                                |
| 1949                                 | Loop chimera 2B                 | ATTCAATTTTCTTGCTGGTTC                                                                               |
| 2000                                 | Loop chimera 3A                 | ATTAGAACCAGCAAGAAAATTGAATAAAGCTAGTGTTTTAAC<br>C                                                     |
| 1358                                 | Loop chimera 3B                 | CTTTCGGGCTTTGTTAGCAG                                                                                |
| Oligos used for MYC tagging          |                                 |                                                                                                     |
| 1432                                 | <i>Cph2</i> -MYC FW             | TGCCTTGCCATTTTTCGTATTTGTTTCCTAATGCTATTCTTAA<br>CCCATCGCCATTGACTATTCAATTACGGATCCCCGGGTAAAT<br>TAACGG |
| 1693                                 | <i>Cph2</i> -MYC RV             | AACCCACATTCCTTATGAAACAAAATAAAATTAACAATCT<br>ATACCTGAAAAAAGAAACACTGGCGGCCGCTCTAGAACTAG<br>TGGATC     |
| Oligos used for qPCR                 |                                 |                                                                                                     |
| 2261                                 | <i>ORF19.3242</i> FW            | GCGGAGACAAAGATCGACAC                                                                                |
| 2262                                 | <i>ORF19.3242</i> RV            | TATTACTGACGCTGGTGGGG                                                                                |
| 1829                                 | <i>ORF19.921</i> FW             | GACACCAATCTCATCAATTAC                                                                               |

---

|      |                      |                       |
|------|----------------------|-----------------------|
| 1830 | <i>ORF19.921</i> RV  | AAATCTACTGGGAATCCTCC  |
| 2462 | <i>ORF19.4941</i> FW | CAAACCACAAGCAACTCCGA  |
| 2463 | <i>ORF19.4941</i> RV | TGCGCAATACTGTCTGATGTG |

---
