# Supplementary material for: Diversification of DNA binding specificities enabled SREBP transcription regulators to expand the repertoire of cellular functions that they govern in fungi
Source: PubMed Central journal article supplement (PMC6329520; doi:10.1371/journal.pgen.1007884), 2018-12-31
Supplement: pgen.1007884.s006.pdf [file pgen.1007884.s006.pdf]

**S6 Table.** Recombinant protein expression plasmids

| <b>Plasmid name</b>     | <b>Plasmid number</b> | <b>Description</b>                              | <b>Reference</b> |
|-------------------------|-----------------------|-------------------------------------------------|------------------|
| His6- <i>CaCph2</i>     | JCP567                | pLIC-H3 with 6xHis <i>CaCph2</i> (aa197-302)    | This study       |
| His6-MBP- <i>CaTye7</i> | JCP726                | pbRZ75 with 6xHis-MBP <i>CaTye7</i> (aa121-269) | This study       |
| His6- <i>CaHms1</i>     | JCP565                | pLIC-H3 with 6xHis <i>CaHms1</i> (aa463-686)    | This study       |
| His6-MBP- <i>CpHms1</i> | JCP833                | pbRZ75 with 6xHis-MBP <i>CpHms1</i> (aa486-659) | This study       |
| His6- <i>AfSrbA</i>     | JCP831                | pLIC-H3 with 6xHis <i>AfSrbA</i> (aa463-686)    | This study       |
| His6-Chimera1           | JCP822                | pLIC-H3 with 6xHis Helix1 chimera               | This study       |
| His6-Chimera2           | JCP823                | pLIC-H3 with 6xHis Helix2 chimera               | This study       |
| His6-Chimera3           | JCP824                | pLIC-H3 with 6xHis Helix1 + Loop chimera        | This study       |
| His6-Chimera4           | JCP836                | pLIC-H3 with 6xHis Loop chimera                 | This study       |
| His6-Anc4               | JCP817                | pLIC-H3 with 6xHis Ancestor 4                   | This study       |
| His6-Anc5.3             | JCP921                | pLIC-H3 with 6xHis Ancestor 5.3                 | This study       |
