# Supplementary material for: Diversification of DNA binding specificities enabled SREBP transcription regulators to expand the repertoire of cellular functions that they govern in fungi
Source: PubMed Central journal article supplement (PMC6329520; doi:10.1371/journal.pgen.1007884), 2018-12-31

# S1 Fig.

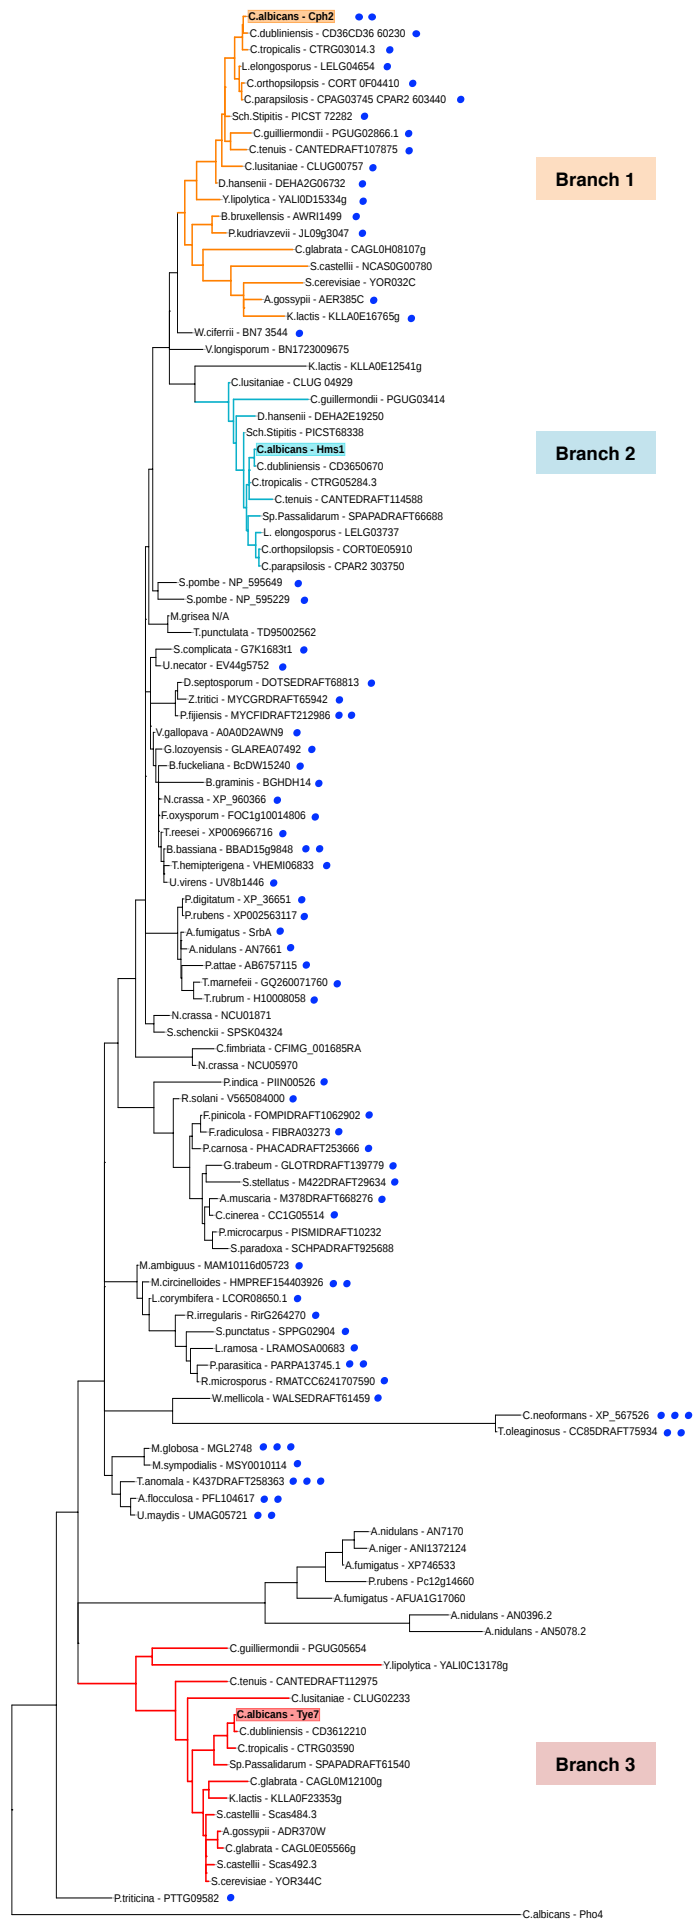

Supplement: pgen.1007884.s008.pdf [file pgen.1007884.s008.pdf]
