# Supplementary material for: Diversification of DNA binding specificities enabled SREBP transcription regulators to expand the repertoire of cellular functions that they govern in fungi
Source: PubMed Central journal article supplement (PMC6329520; doi:10.1371/journal.pgen.1007884), 2018-12-31

# S3 Fig.

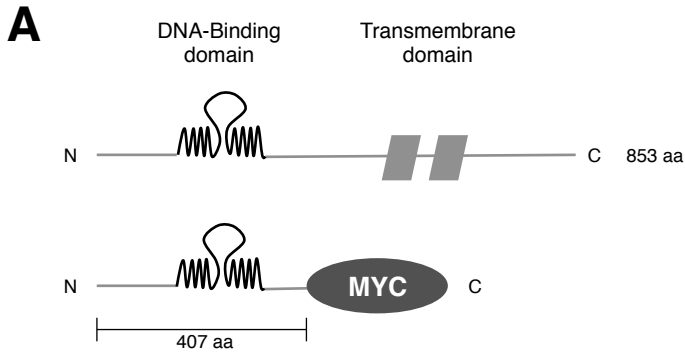

## B

| ORF        | Gene name    | Peak value<br>- log <sub>10</sub> p-value | Fold enrichment | Motif score |
|------------|--------------|-------------------------------------------|-----------------|-------------|
| orf19.921  | <i>HMS1</i>  | 61,27                                     | 5,17            | 4,1         |
| orf19.3794 | <i>CSR1</i>  | 42,25                                     | 4,49            | 3,9         |
| orf19.3549 | <i>CDC21</i> | 34,07                                     | 3,45            | 3,2         |
| orf19.3337 |              | 26,05                                     | 2,94            | 3,4         |
| orf19.2333 |              | 50,89                                     | 4,16            | 4,8         |
| orf19.4941 | <i>TYE7</i>  | 20,14                                     | 2,97            | 3,1         |
| orf19.6736 |              | 24,50                                     | 2,48            | 2,8         |
| orf19.4167 |              | 35,59                                     | 3,88            | 3,3         |
| orf19.2723 | <i>HIT1</i>  | 32,56                                     | 3,24            | 3,2         |
| orf19.4309 | <i>GRP2</i>  | 25,16                                     | 3,02            | 3,8         |
| orf19.7502 |              | 25,60                                     | 2,82            | 4,6         |
| orf19.3261 |              | 17,48                                     | 2,29            | 4,2         |
| orf19.7561 | <i>DEF1</i>  | 32,49                                     | 3,29            | -           |
| orf19.610  | <i>EFG1</i>  | 25,80                                     | 3,02            | 3,1         |

## C

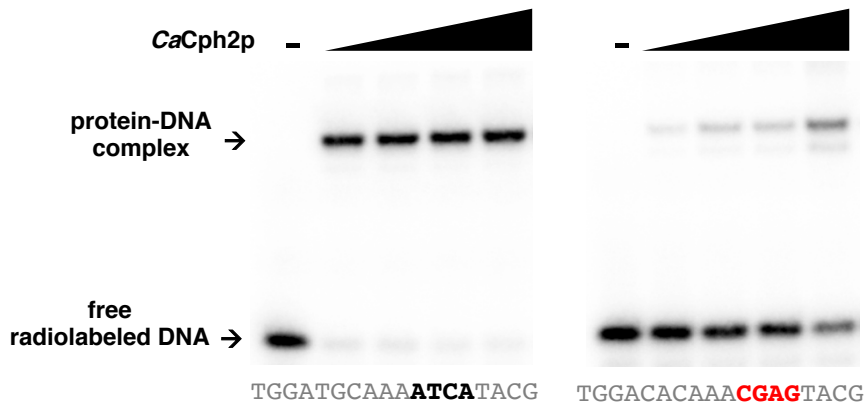

Supplement: pgen.1007884.s010.pdf [file pgen.1007884.s010.pdf]
