# Supplementary material for: Diversification of DNA binding specificities enabled SREBP transcription regulators to expand the repertoire of cellular functions that they govern in fungi
Source: PubMed Central journal article supplement (PMC6329520; doi:10.1371/journal.pgen.1007884), 2018-12-31

# S7 Fig.

## A

Threshold:  
 $\log_2$  Fold change  $|2|$   
 $-\log_{10} P\text{-value} > 20$

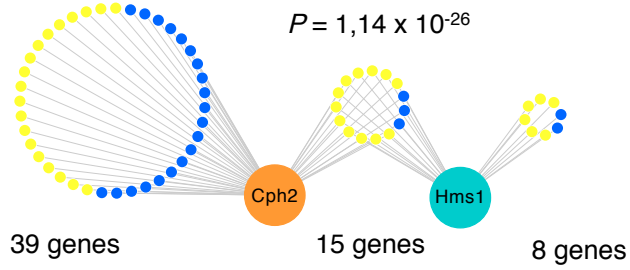

## B

Threshold:  
 $\log_2$  Fold change  $> 1$   
 $P\text{-value} < 0,001$

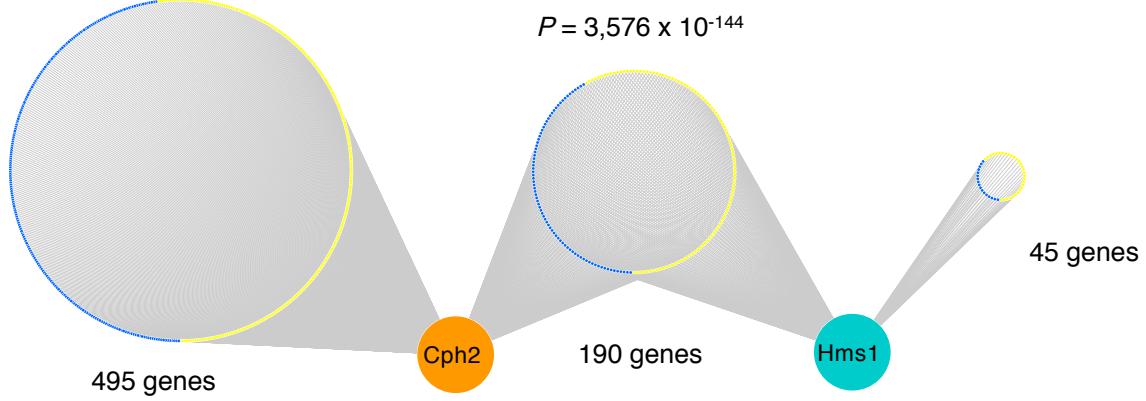

Supplement: pgen.1007884.s014.pdf [file pgen.1007884.s014.pdf]
