# Supplementary material for: Diversification of DNA binding specificities enabled SREBP transcription regulators to expand the repertoire of cellular functions that they govern in fungi
Source: PubMed Central journal article supplement (PMC6329520; doi:10.1371/journal.pgen.1007884), 2018-12-31

# S8 Fig.

## A

- Non-palindromic
- Palindromic

AGTCCCTTTT**A**TCA**G**CC**A**TTTTAGGCCT

AGTCCCTTTT**A**TCA**G**T**G**ATTTTAGGCCT

## B

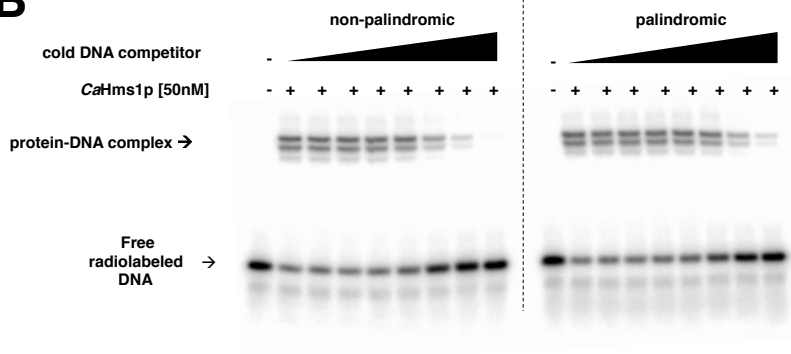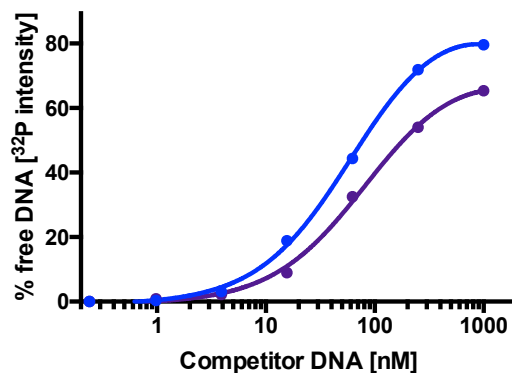

## C

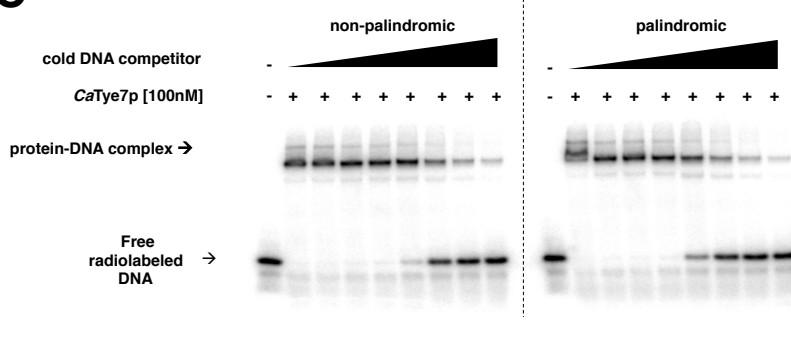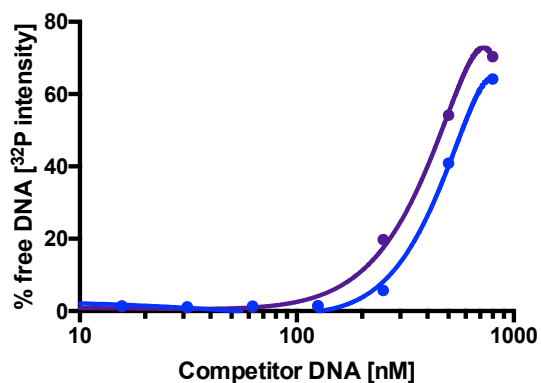

Supplement: pgen.1007884.s015.pdf [file pgen.1007884.s015.pdf]
